# Supplementary material for: Fine control over the morphology and photocatalytic activity of 3D ZnO hierarchical nanostructures: capping vs. etching
Source: Royal Society of Chemistry journal article supplement (doi:10.1039/c5ra08325g), 2015-01-01
Supplement: c5ra08325g1.pdf [file c5ra08325g1.pdf]

## Electronic Supplementary Information

### Fine control over the morphology and photocatalytic activity of 3D ZnO hierarchical nanostructures: capping vs. etching

Jawayria Mujtaba <sup>a</sup>, Hongyu Sun <sup>\*a</sup>, Fang Fang <sup>a</sup>, Mashkoo Ahmad <sup>b</sup>, Jing Zhu <sup>\*a</sup>

<sup>a</sup> *Beijing National Center for Electron Microscopy, School of Materials Science and Engineering, The State Key Laboratory of New Ceramics and Fine Processing, Key Laboratory of Advanced Materials (MOE), Tsinghua University, Beijing 100084, China*

<sup>b</sup> *Nanomaterials Research Group, Physics Division, Pakistan Institute of Nuclear Science and Technology, P.O. Nilore, Islamabad 44000, Pakistan*

*E-mail: [hysuny@mail.tsinghua.edu.cn](mailto:hysuny@mail.tsinghua.edu.cn) (H. Sun), [jzhu@mail.tsinghua.edu.cn](mailto:jzhu@mail.tsinghua.edu.cn) (J. Zhu)*

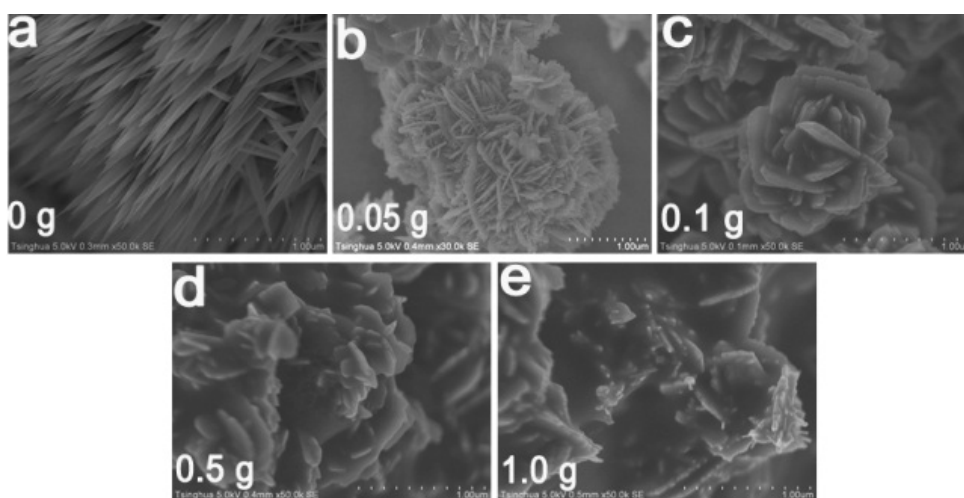

**Fig. S1** FESEM images of the ZnO nanostructures with the addition of different amount of CA.

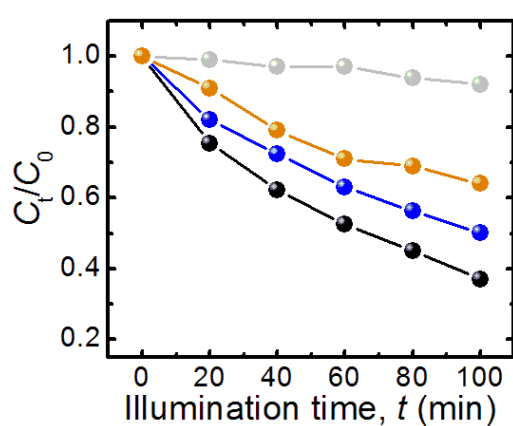

**Fig. S2** Degradation of RhB solutions in the presence of different ZnO photocatalysts, including N-SFs (blue curve), NFs (black curve), commercial ZnO powders (orange curve), and without any photocatalyst (gray curve) under visible light irradiation ( $\lambda > 420$  nm). It can be seen that all ZnO samples exhibit photocatalytic activities, and the photocatalytic degradation of RhB follows the order: NFs > N-SFs > commercial ZnO powders.
